# Supplementary material
Source: publisher site journal article supplement (https://www.spandidos-publications.com/5923/downloadSupplementary)
Supplement: Supplementary file 1 [file downloadSupplementary]

## Sheet: Sheet1
Table SIII. Sequences of TFR2 siRNA and primers.
Target	Sequence (5’-3’)
siNC	F: UUCUCCGAACGUGUCACGUTT
	R: ACGUGACACGUUCGGAGAATT
si-TFR2 1#	F: GGCUAGUGGUCAACAAUCATT
	R: UGAUUGUUGACCACUAGCCTT
si-TFR2 2#	F: CUCAAGGAGUGCUCAUAUATT
	R: UAUAUGAGCACUCCUUGAGTT
si-TFR2 3#	F: GUCUGGAACAUUGAUAACATT
	R: UGUUAUCAAUGUUCCAGACTT
TFR2	F: GCTTCAGGAGGGGACACA
	R: TCCACACGCTGGTAGACG
GAPDH	F: GGAGCGAGATCCCTCCAAAAT
	R: GGCTGTTGTCATACTTCTCATGG
si, small interfering; TFR2, transferrin receptor 2; F, forward; R, reverse.
